# Supplementary material for: The positive correlation between the dispersion and catalytic performance of Fe2O3 nanoparticles in nano-Fe2O3–ultrafine AP energetic composites supported by solid UV-vis spectroscopy
Source: Royal Society of Chemistry journal article supplement (doi:10.1039/d3dt02112b), 2023-01-01
Supplement: d3dt02112b1.pdf [file d3dt02112b1.pdf]

# **The positive correlation between the dispersion and catalytic performance of Fe<sub>2</sub>O<sub>3</sub> nanoparticles in nano-Fe<sub>2</sub>O<sub>3</sub>–ultrafine AP energetic composites supported by solid UV-vis spectrum**

Yong Kou<sup>1</sup>, Peng Luo<sup>2</sup>, Lei Xiao<sup>1\*</sup>, Yanping Xin<sup>2</sup>, Guangpu Zhang<sup>1</sup>, Yubing Hu<sup>1</sup>, Hongxu Gao<sup>3</sup>,  
Fengqi Zhao<sup>3</sup>, Wei Jiang<sup>1</sup>, Gazi Hao<sup>1\*</sup>

<sup>1</sup> National Special Superfine Powder Engineering Research Center of China, School of Chemistry and Chemical Engineering, Nanjing University of Science and Technology, Nanjing 210094, China;

<sup>2</sup> Xi'an North Huian Chemical Industry Co. Ltd, Xi'an, 710302, China;

<sup>3</sup> Xi'an Modern Chemistry Research Institute, Xi'an 710065, China;

Correspondence: 15005161138@163.com (Lei Xiao), +86 15005161138, Nanjing 210094, China;

hgznjust1989@163.com (Gazi Hao), +86 18913903891, Nanjing 210094, China;

## **Theoretical basis for the dispersity of nano-Fe<sub>2</sub>O<sub>3</sub> in ultrafine AP**

UV-Vis diffuse reflectance spectroscopy tests were performed on each sample with UV-2600. BaSO<sub>4</sub> was the comparison sample; the wavelength range was 1100–190 nm; the photometric range was from –5 to 5 Abs; wavelength accuracy was ±0.3 nm; resolution was 0.1; and wavelength scan was 0.5 nm; stray light was <0.005%; and the detector was a photomultiplier tube. This study was based on the large differences in solid UV absorbance of different substances. Nano-Fe<sub>2</sub>O<sub>3</sub>, as a nanometal oxide, has strong absorbance for solid UV because of its small particle size and high activity. The difference in absorbance of ultrafine AP to solid UV was small owing to the properties

of ionic compounds, whereas that of  $\text{BaSO}_4$  to solid UV was almost 0. The absorbance of composites to solid UV improves with increase in the dispersion of nano- $\text{Fe}_2\text{O}_3$ , therefore the dispersity of nano- $\text{Fe}_2\text{O}_3$  in ultrafine AP can be qualitatively and quantitatively analyzed based on the change of absorbance. Moreover, diffusely reflected light can enter the interior of the samples and interact with the molecules through processes such as reflection, refraction, diffraction, and absorption, and therefore the structure and composition information of the samples are loaded, which is convenient for further analysis. Baseline test was performed with  $\text{BaSO}_4$  as the reference sample, and then the absorbance of the samples was tested. The schematic diagram is shown in Figure S1.

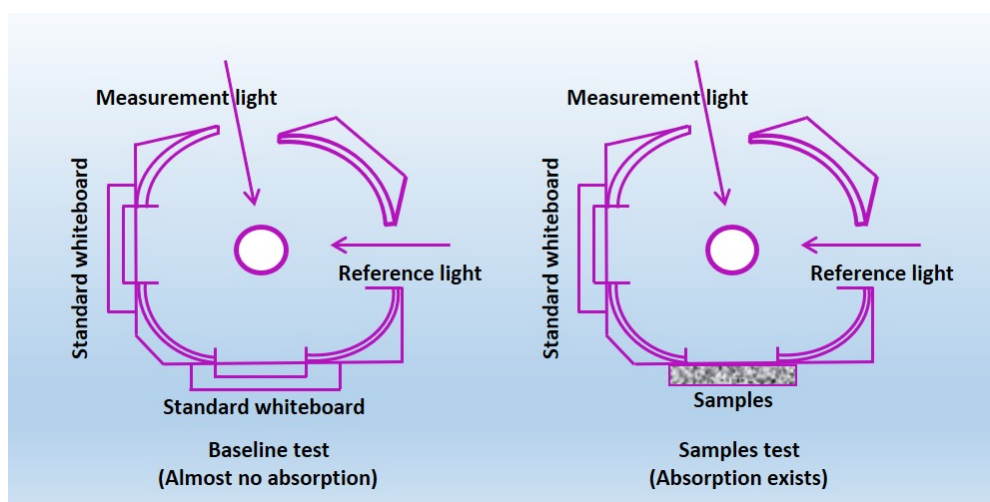

Figure S1. Schematic diagram of integrating sphere

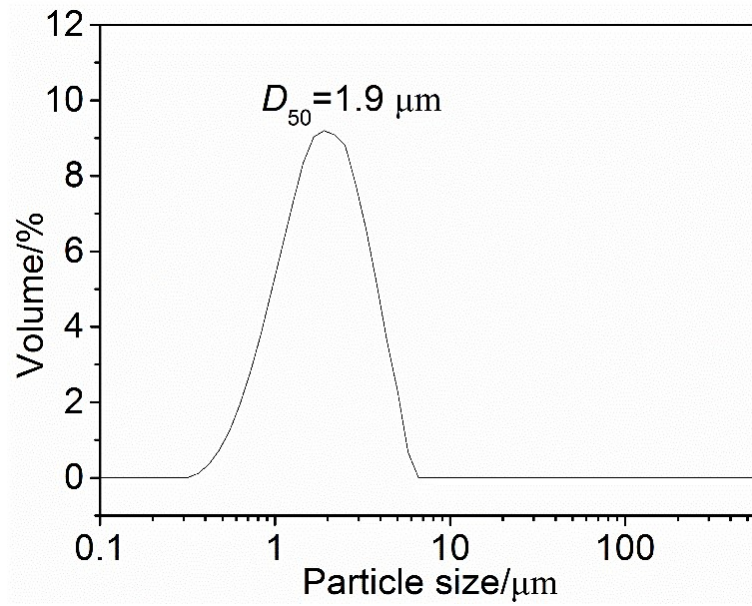

Figure S2. Particle size distribution of ultrafine AP

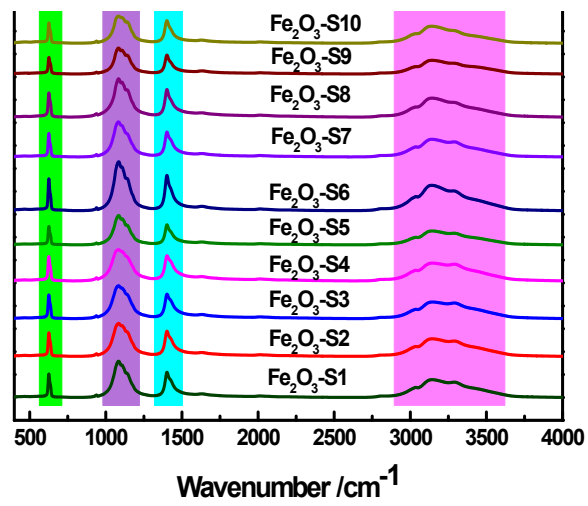

Figure S3. IR spectrum of nano- $\text{Fe}_2\text{O}_3$ -ultrafine AP composites
